# Supplementary material for: Preparation and purification of 5′-amino-5′-deoxyguanosine-5′-N-phosphoramidate and its initiation properties with T7 RNA polymerase
Source: Royal Society of Chemistry journal article supplement (doi:10.1039/b717896d), 2008-01-01

$^{31}\text{P}$  NMR ( $^1\text{H}$  coupled) spectrum of crude reaction product before ion exchange chromatography.

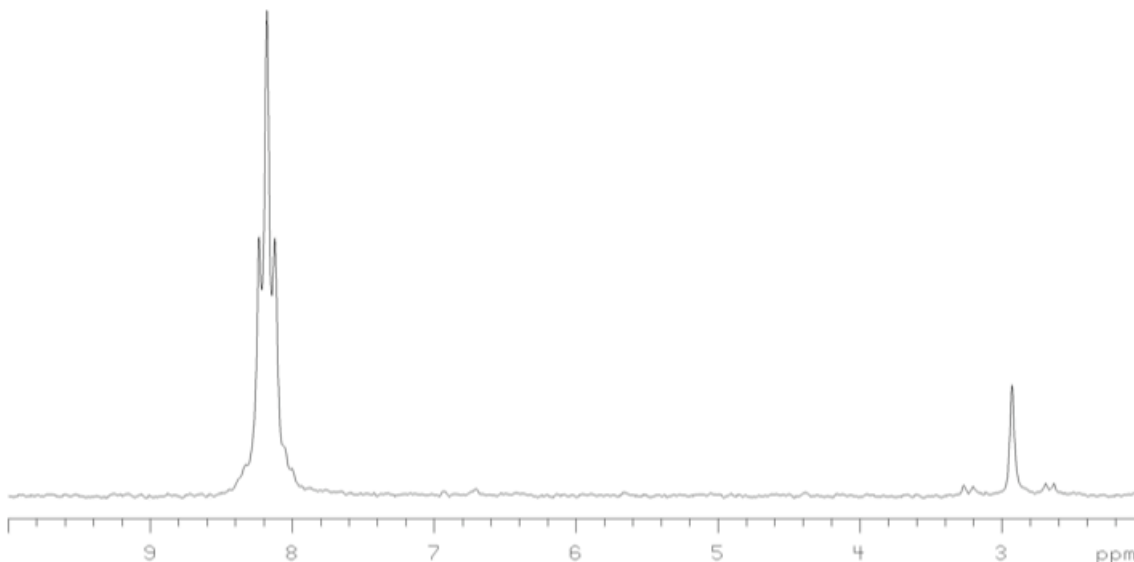

After lyophilisation the crude material retained a large amount of water and we were unable to obtain a reasonable  $^1\text{H}$  NMR spectrum of this material.

$^{31}\text{P}$  NMR spectrum ( $^1\text{H}$  coupled) of GNHP after chromatography and repeated lyophilisation from  $\text{D}_2\text{O}$ .

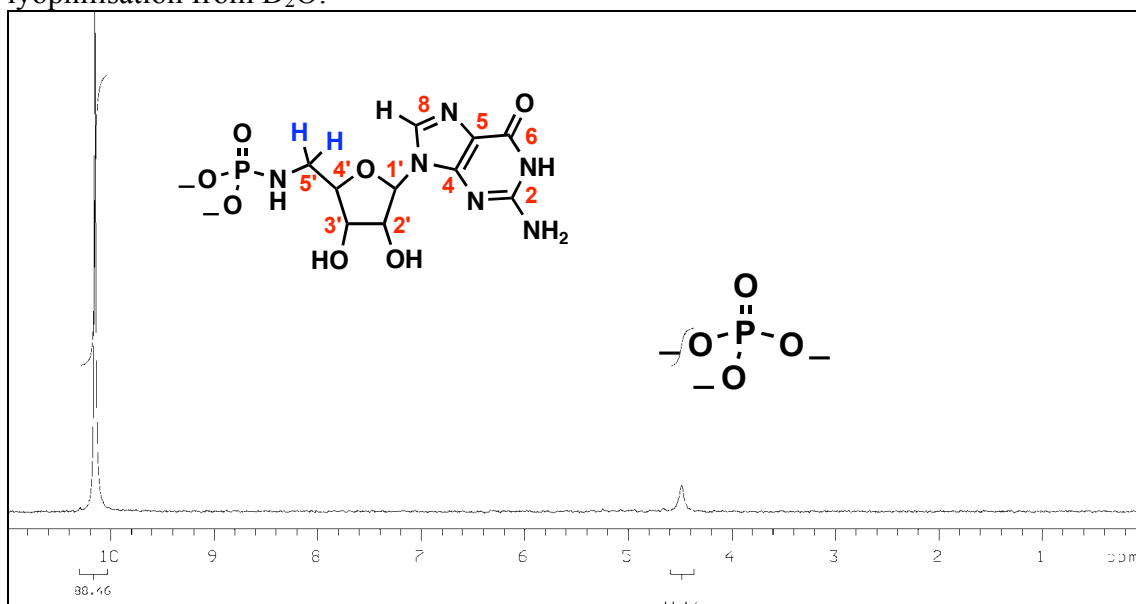

$^1\text{H}$  NMR spectrum of GNHP after chromatography and repeated lyophilisation from  $\text{D}_2\text{O}$ .

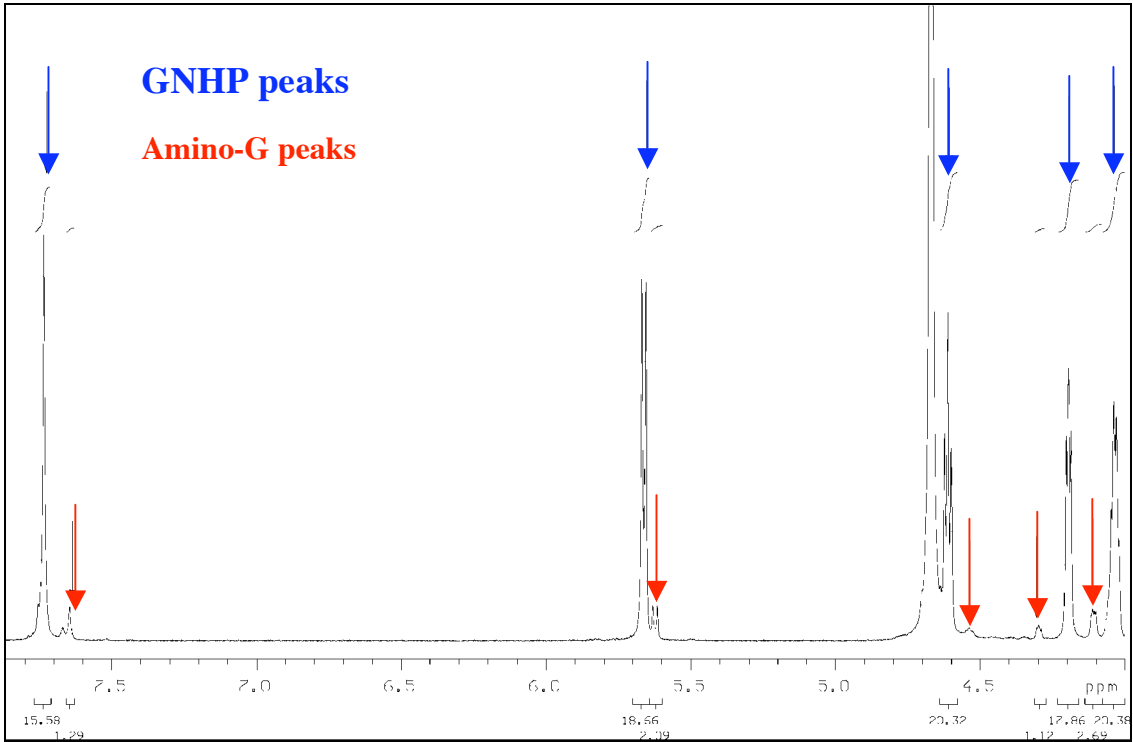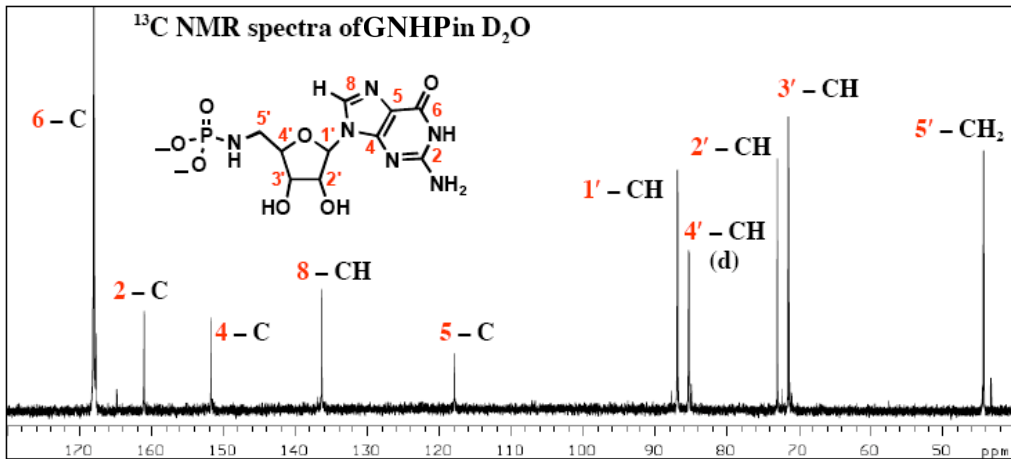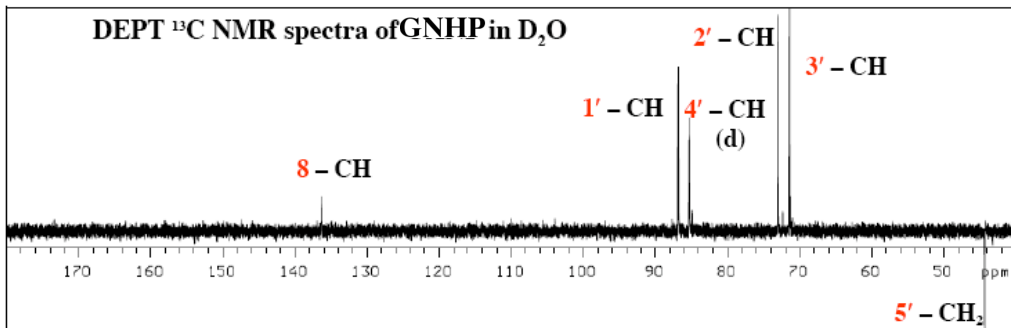

Supplement: b717896d.pdf [file b717896d.pdf]
